# Supplementary material for: Fast and precise magnetophoresis of superparamagnetic nanoparticles on a micro-magnetic substrate in a static liquid environment
Source: Royal Society of Chemistry journal article supplement (doi:10.1039/d5lc01072a), 2026-01-01
Supplement: d5lc01072a5.pdf [file d5lc01072a5.pdf]

| Condition           | SNP + <b>non-biotinylated</b> DNA                                                                         | SNP + <b>biotinylated</b> DNA                                                       |
|---------------------|-----------------------------------------------------------------------------------------------------------|-------------------------------------------------------------------------------------|
| Composition         | Tris HCl 10 mM<br>Streptavidin SNP 0.29 mg/mL<br>Fluorescent non-biotinylated or biotinylated DNA 4 µg/mL |                                                                                     |
| Experimental steps  | - 10 min SNP incubation<br>- 5 min SNP capture                                                            |                                                                                     |
| Bright field images | 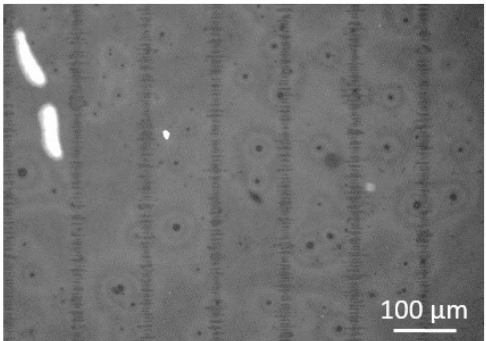                         |   |
| Fluorescence images |                         |  |
