# Supplementary figures and images for: Fast and precise magnetophoresis of superparamagnetic nanoparticles on a micro-magnetic substrate in a static liquid environment
Source: Royal Society of Chemistry journal article supplement (doi:10.1039/d5lc01072a), 2026-01-01

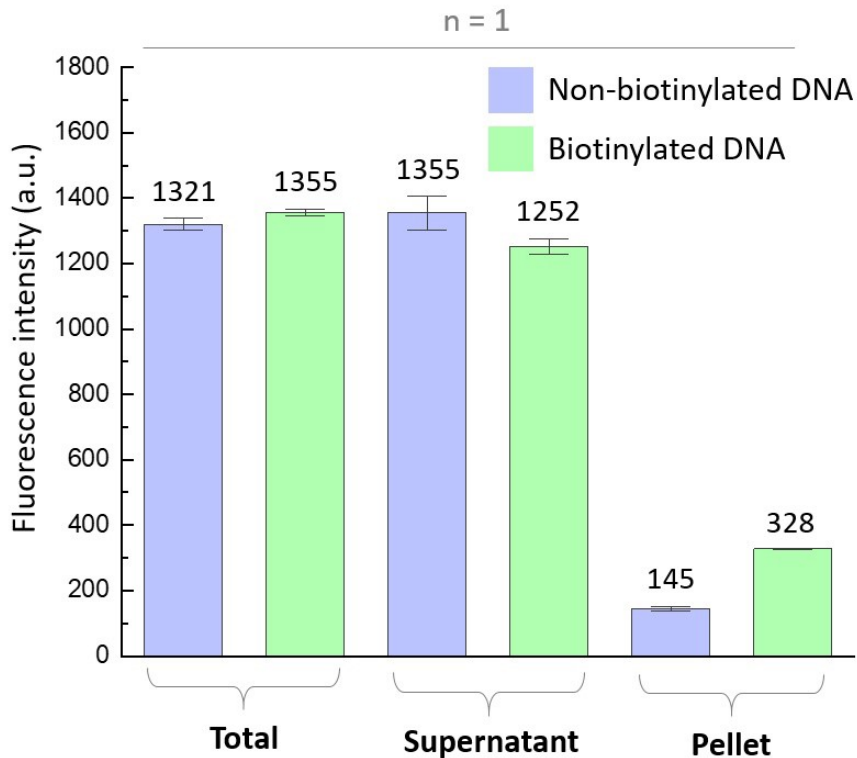

Supplement: d5lc01072a4.pdf [file d5lc01072a4.pdf]
